# Supplementary material for: Self-assembled calcium phosphate nanocomposites using block copolypeptide templates
Source: Royal Society of Chemistry journal article supplement (doi:10.1039/b904440j), 2009-01-01
Supplement: b904440j.pdf [file b904440j.pdf]

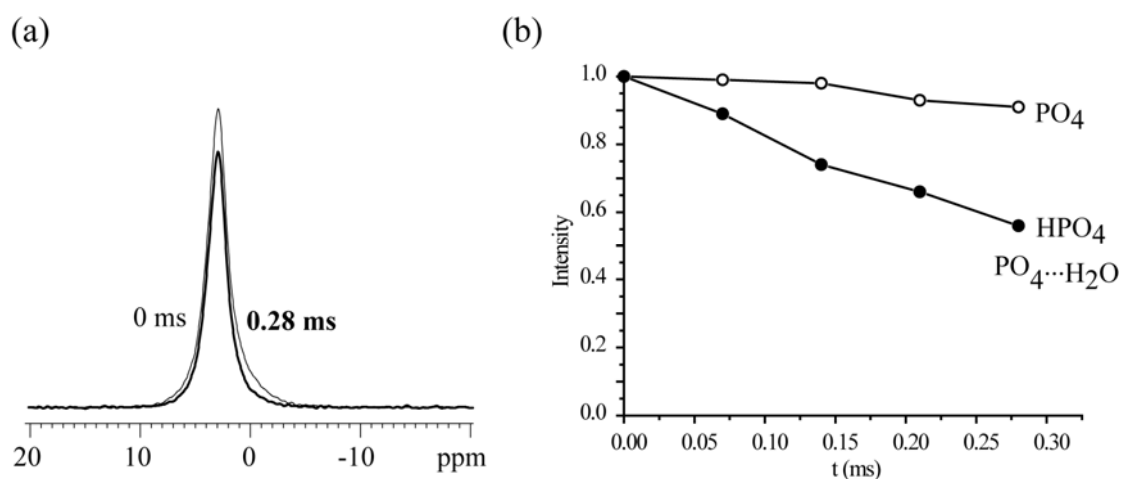

**Figure S1.** Determination of phosphate protonation state by  $^{31}\text{P}$  NMR. (a) DP/MAS with recoupled  $^1\text{H}$ - $^{31}\text{P}$  dipolar dephasing for zero (thin line) and two rotation periods (thick line). (b) Plot of normalized  $^{31}\text{P}$  NMR intensity as a function of dipolar dephasing time.
